# Supplementary material
Source: Springer Nature journal article supplement (https://www.springermedizin.de/resource/supplementary/12986_2013_588_MOESM1_ESM.pdf/25655086)

**A**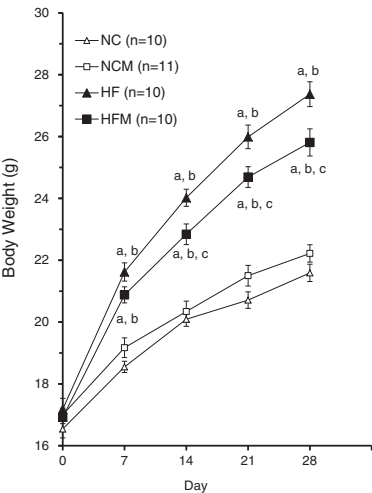**B**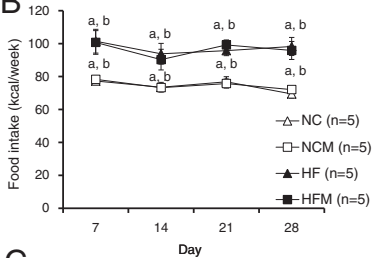**C**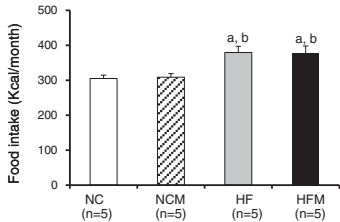

Supplement: MOESM1 [file 25655086]
